# Supplementary material for: Intratumoral depletion of regulatory T cells using CD25-targeted photodynamic therapy in a mouse melanoma model induces antitumoral immune responses
Source: PubMed Central journal article supplement (PMC5564577; doi:10.18632/oncotarget.17663), 2017-05-07
Supplement: oncotarget-08-47440-s001.pdf [file oncotarget-08-47440-s001.pdf]

## Intratumoral depletion of regulatory T cells using CD25-targeted photodynamic therapy in a mouse melanoma model induces anti-tumoral immune responses

### Supplementary Materials

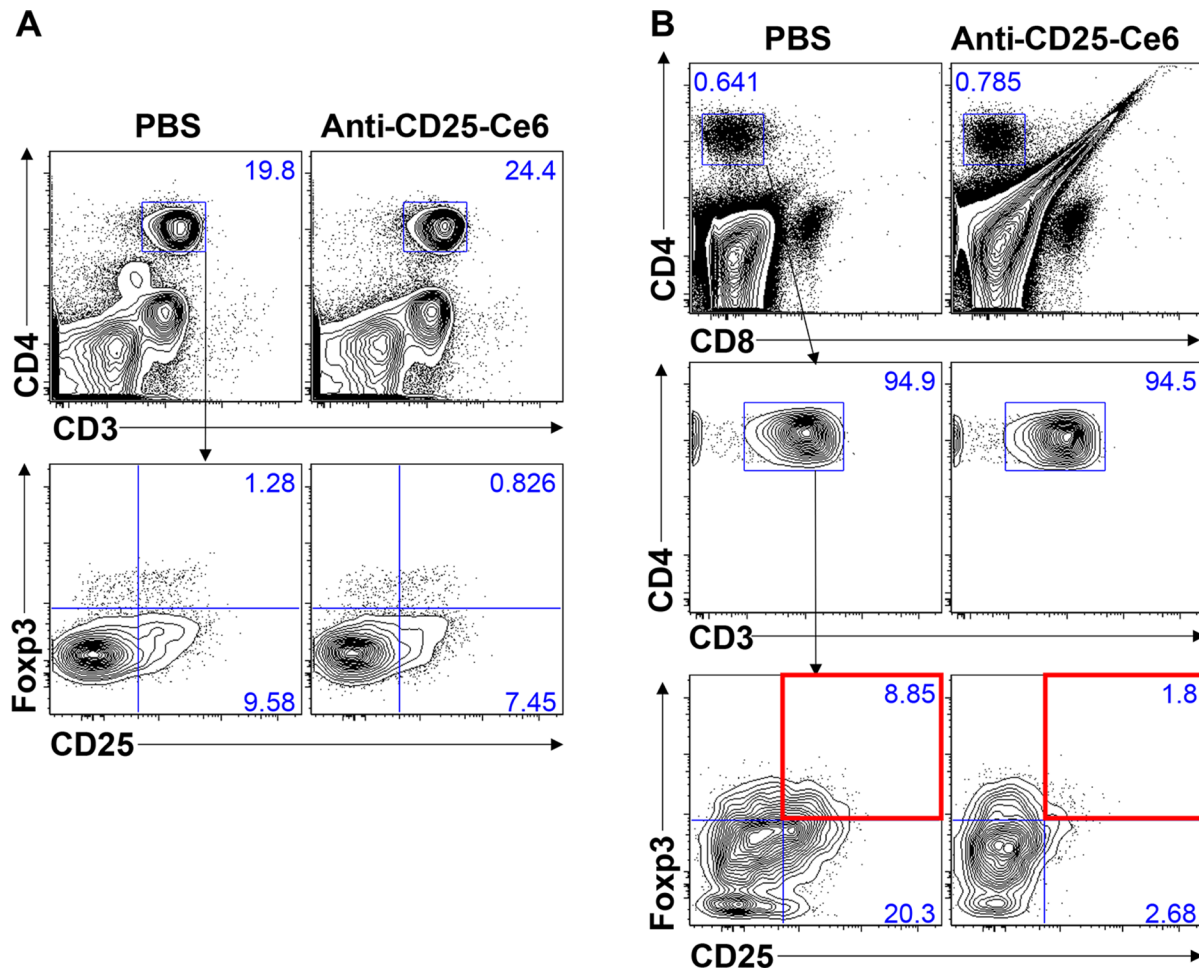

**Supplementary Figure 1: Anti-CD25-Ce6-targeted PDT depletes intratumoral CD4<sup>+</sup> CD25<sup>+</sup> Foxp3<sup>+</sup> Treg and CD4<sup>+</sup> CD25<sup>+</sup> T cells *in vivo*.** Ten days after B16-F10 melanoma cell transplantation, anti-CD25-Ce6 or PBS was injected intratumorally, and tumors were irradiated with a 660-nm laser for 20 min. (A) Draining lymph node and (B) Intratumoral CD4<sup>+</sup> CD25<sup>+</sup> Foxp3<sup>+</sup> Tregs and CD4<sup>+</sup> CD25<sup>+</sup> T cells were monitored using flow cytometry.

### A H2-D<sub>b</sub>-NP<sub>366-374</sub><sup>+</sup> CD8<sup>+</sup> T cell

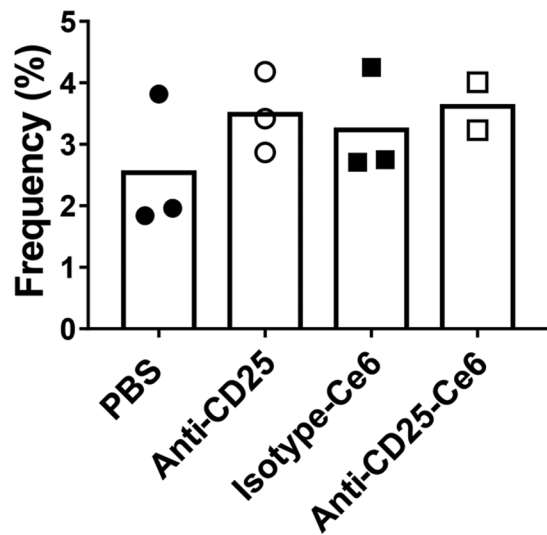

### H2-D<sub>b</sub>-NP<sub>366-374</sub><sup>+</sup> CD8<sup>+</sup> T cell

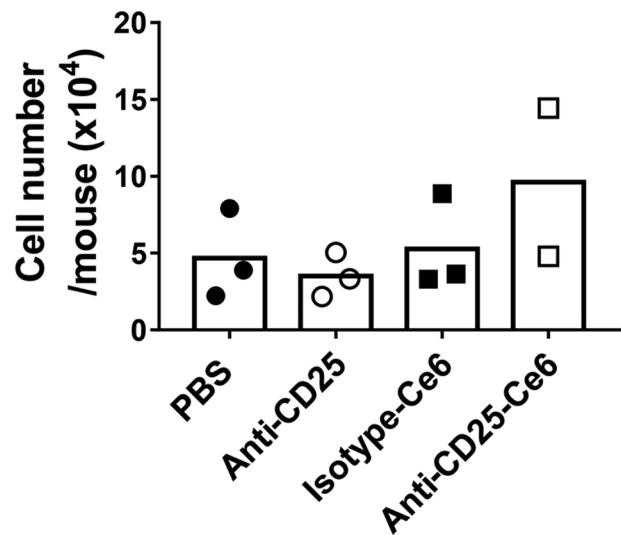

**Supplementary Figure 2: Anti-CD25-Ce6-targeted PDT did not affect the PR8-specific CD8<sup>+</sup> T cell response.** (A) B16-F10 tumor-bearing mice were injected intratumorally with PBS, anti-CD25 antibody, isotype-Ce6, or anti-CD25-Ce6, and PDT was performed twice on a 2-day interval. Next, 25 PFU of PR8 was intranasally administered after PDT completion. PR8 NP<sub>366-374</sub>-specific CD8<sup>+</sup> T cells in lungs were monitored using flow cytometry with the H2-D<sub>b</sub>-NP<sub>366-374</sub> pentamer 7 days after PR8 infection. Data are shown as bar graphs of the frequency of PR8 NP<sub>366-374</sub>-specific CD8<sup>+</sup> T cells; each dot represents an individual mouse.
